# Supplementary material for: Photobleaching step analysis for robust determination of protein complex stoichiometries
Source: PubMed Central journal article supplement — Mol Biol Cell. 2021 Nov 1;32(21):ar35. doi: 10.1091/mbc.E20-09-0568 (PMC8693960; doi:10.1091/mbc.e20-09-0568), 2021-11-01
Supplement: mbc-32-ar35-s001.pdf [file mbc-32-ar35-s001.pdf]

# Supplemental Materials

*Molecular Biology of the Cell*

Hummert *et al.*

## ALGORITHM AND BENCHMARKING

The preliminary step detection (part two in the framework, detailed in the main text) relies on the algorithm developed by Kalafut and Vischer (Kalafut and Visscher, 2008), which uses the Schwarz Information Criterion (SIC) to evaluate steps. In this context the SIC is defined as:

$$SIC(j_1, \dots, j_k) = (k + 2) \log(n) + n \ln \hat{\sigma}_{j_1, \dots, j_k}^2 + n \ln 2\pi + n$$

Steps are successively added until the addition of the step does not improve the SIC further. In the modified version used here steps where the difference in means, i.e. the mean signal before and after the added step, is below a defined threshold parameter, are not added even if they improve the SIC.

The step refinement (part IV in the framework, detailed in the main text) relies on the posterior from Pressé et al. (Tsekouras et al., 2016):

$$\begin{aligned} -2 \ln P(\theta|D) = & \sum_{\phi=0}^K (n_{\phi} \ln(i\sigma_f^2 + \sigma_b^2)) + \sum_{l=1}^{n_{\phi}} \left( \frac{x_l - i\mu_f - \mu_b}{i\sigma_f^2 + \sigma_b^2} \right) \\ & + 2 \left( -K \ln \lambda - \ln((m-K)!) - \ln K! - \ln(m-1)! + \sum_{y=0}^{m-K} \ln d_y! \right) \\ & + 2 \left( \gamma_0 \frac{m-K+1}{K} + \ln(m-K+2) + \ln(m-K+1) - \ln(m-K+2) \right. \\ & \left. - (m-K+1)e^{-\gamma_0/K} \right) \end{aligned}$$

This expression is minimized iteratively, with fixed hyperparameters, using the algorithm in the flowchart (Figure 2b in the manuscript).

## SUPPORTING TABLES

**Table S1**

Spectroscopic properties of fluorophores used. Properties determined in PBS, pH 7.4-7.5 unless stated otherwise.  $\epsilon$  extinction coefficient,  $\phi$  fluorescence quantum yield,  $\lambda_{\text{peak}}$  peak absorption wavelength,  $\lambda_{\text{ex}}$  excitation wavelength. Spectral correction factors ( $CF_{\lambda}$ ) were determined from published spectra or spectra measured for unconjugated BG/HA-dyes.

| Fluorophore | $\epsilon$ [ $\times 10^3 \text{ M}^{-1} \text{ cm}^{-1}$ ] | $\phi_{\text{fl}}$  | $\lambda_{\text{peak}}$ [nm] | $\lambda_{\text{ex}}$ [nm] | $CF_{\lambda}$ | Primary ref.               |
|-------------|-------------------------------------------------------------|---------------------|------------------------------|----------------------------|----------------|----------------------------|
| EGFP        | 55.9                                                        | 0.6                 | 488                          | 488                        | 0.62           | Cormack et al. (1996)      |
| mNeonGreen  | 116                                                         | 0.8                 | 506                          | 488                        | 1.0            | Shaner et al. (2013)       |
| mCherry     | 72                                                          | 0.22                | 587                          | 561                        | 0.64           | Shaner et al. (2004)       |
| BG-TMR      | 89 <sup>a,f</sup>                                           | 0.39 <sup>b,g</sup> | 555 <sup>f</sup>             | 561                        | 0.86           | Keppler et al. (2003)      |
| BG-SiR      | 43.2 <sup>c,g</sup>                                         | 0.30 <sup>b,g</sup> | 650 <sup>g</sup>             | 640                        | 0.75           | Lukinavicius et al. (2013) |
| HTL-TMR     | 78 <sup>d,f</sup>                                           | 0.41 <sup>d,f</sup> | 548 <sup>f</sup>             | 561                        | 0.89           | Los et al. (2008)          |
| HTL-SiR     | 130.2 <sup>c,g</sup>                                        | 0.39 <sup>b,g</sup> | 648 <sup>g</sup>             | 640                        | 0.71           | Lukinavicius et al. (2013) |
| ATTO 647N   | 150 <sup>e</sup>                                            | 0.65 <sup>e</sup>   | 646                          | 640                        | 0.92           | ATTO-TEC                   |

<sup>a</sup> (Keppler et al., 2006)

<sup>b</sup> (Lukinavicius et al., 2013)

<sup>c</sup> (Erdmann et al., 2019)

<sup>d</sup> Tetramethylrhodamine, (Grimm et al., 2015)

<sup>e</sup> ATTO-TEC data sheet available at <https://www.atto-tec.com>

<sup>f</sup> Free dye

<sup>g</sup> Protein conjugate

## Table S2

### Symbols used

| SIC               |                                                       |
|-------------------|-------------------------------------------------------|
| $j_1, \dots, j_k$ | Step positions                                        |
| $n$               | Timepoints in the trace                               |
| $\hat{\sigma}^2$  | Sum over the variances of data between steps          |
| Posterior         |                                                       |
| $\theta$          | Bayesian parameters                                   |
| $D$               | Data (photobleaching trace)                           |
| $K$               | Number of steps                                       |
| $n_\phi$          | Timepoints in interval $\phi$                         |
| $\sigma_f$        | Standard deviation of the single fluorophore signal   |
| $\sigma_b$        | Standard deviation of the background signal           |
| $x_l$             | Signal at timepoint $l$                               |
| $i$               | Active number of fluorophores at timepoint            |
| $\mu_f$           | Mean signal of a single fluorophore                   |
| $\mu_b$           | Mean background signal                                |
| $\lambda$         | Poisson distribution parameter for event occurrences  |
| $m$               | Number of events (single fluorophore switches)        |
| $d_y$             | Number of data points between steps                   |
| $\gamma_0$        | Cutoff for the hyperparameter constraining $K$ to $m$ |

## SUPPORTING FIGURES

**Figure S1**

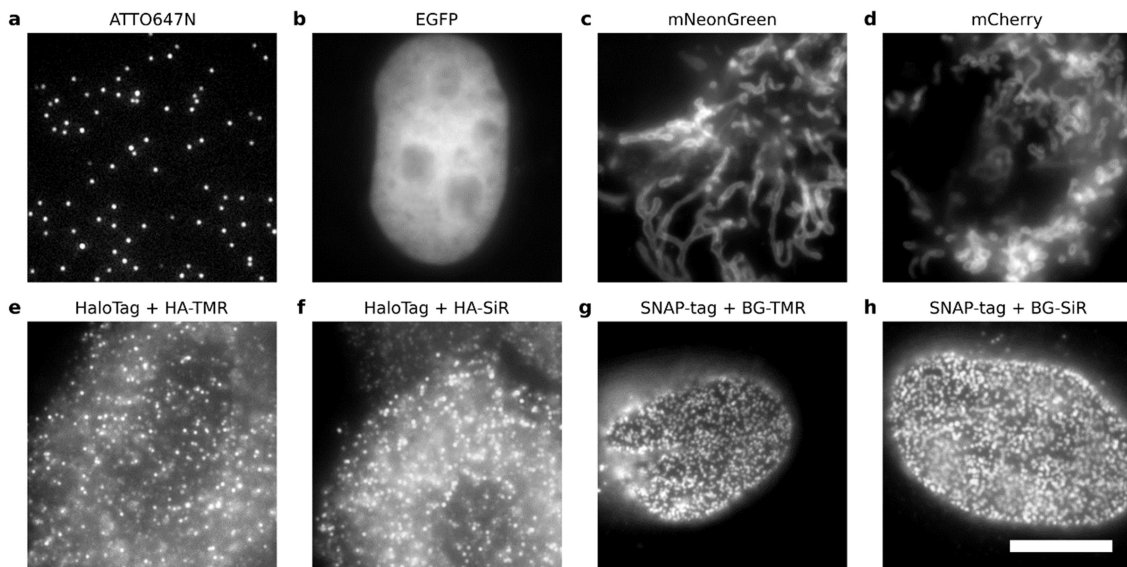

Representative images from samples used for photostability characterization. **a**, DNA-conjugated and surface-immobilized ATTO-647N. **b**, COS-7 cells transiently expressing histone 2A (H2A-EGFP-HaloTag). **c**, COS-7 cells transiently expressing mNeonGreen-TOMM20. **d**, COS-7 cells transiently expressing TOMM20-mCherry-HaloTag. **e,f**, HeLa cells stably expressing GlnA-HaloTag. Cells were labeled with 100 nM HTL-TMR (e) or HTL-SiR (f) for 120 min. **g,h**, U2OS cells stably expressing NUP107-SNAP-tag were labeled with 200 nM BG-TMR (g) or BG-SiR (h) for 120 min. Representative images from 2 independent experiments per condition are shown. Scale bar: 10  $\mu$ m.

**Figure S2**

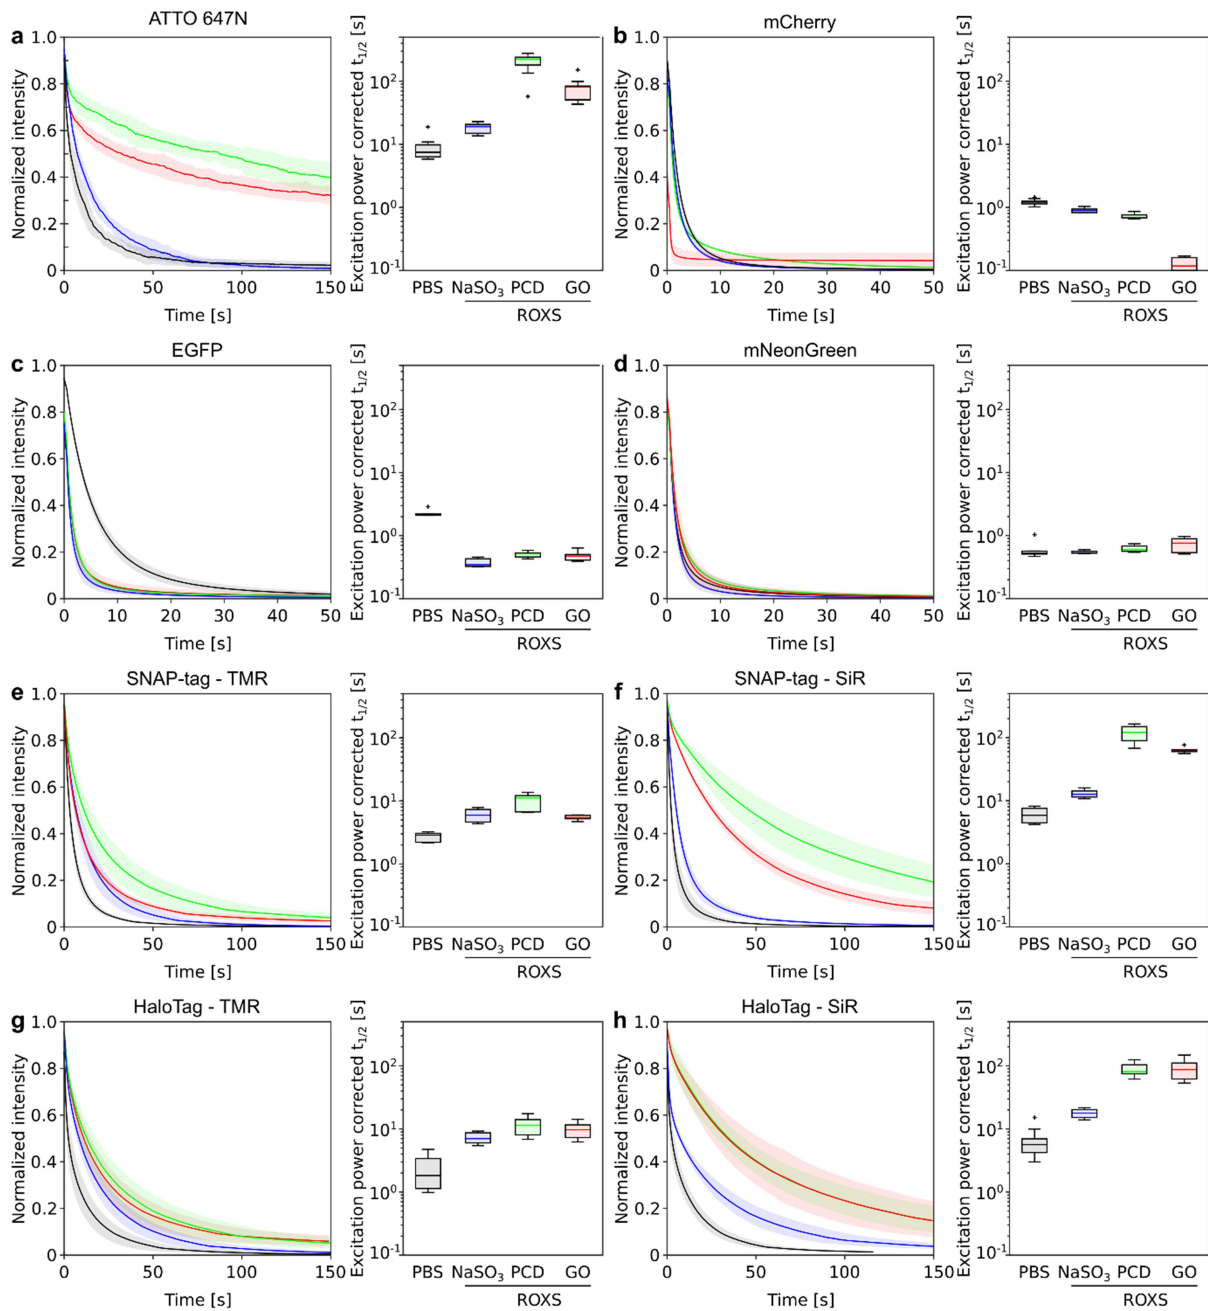

Photostability measurements for fluorescent proteins and protein tag substrates. Each fluorophore was exposed to high intensity illumination in respective buffers. Left: Photobleaching curves upon illumination for different buffers. Colors as in box plots. Mean (line) $\pm$ SD (shaded region) from 7-10 measurements from 2 independent experiments per condition. Right: Corresponding  $t_{1/2}$  corrected for excitation power density. Box plots indicate median, 25<sup>th</sup> and 75<sup>th</sup> percentiles. Whiskers extend to 1x interquartile range, outliers are plotted as crosses. **a**, 9 (PBS) or 10 (all other conditions) measurements per condition. **b**, 10 measurements per condition. **c**, 10

(PBS), 7 (NaSO<sub>3</sub>), 9 (ROXS PCD and ROXS GodCat) per condition. **d**, 10 (PBS, ROXS PCD) or 9 (NaSO<sub>3</sub>, ROXS GodCat) per condition. **e**, 9 (PBS) or 10 (all other conditions) measurements per condition. **f**, 9 (ROXS GodCat) or 10 (all other conditions) measurements per condition. **g,h**, 10 measurements per condition.

**Figure S3**

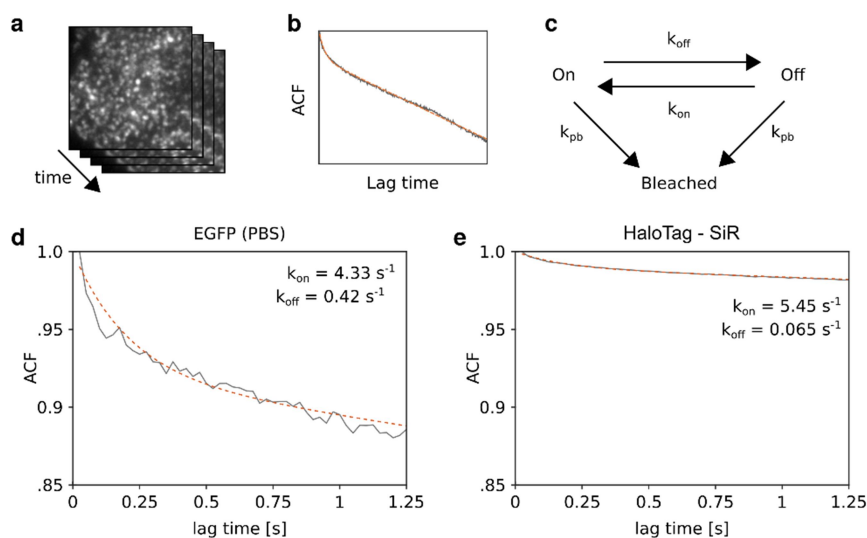

Principle of image correlation-based characterization of photoblinking. **a**, An image time series recorded showing blinking fluorophores is used as input data. **b**, The temporal autocorrelation function (ACF) is computed according to routine described in (Sehayek et al., 2019). **c**, A 3-state model with a fluorescent on-state, a non-fluorescent off-state and a non-fluorescent bleached state with reversible transitions between on- and off-state and irreversible transition into the bleach state is fitted to ACF. **d,e**, Representative fits (orange, dashed) and raw ACFs (grey) for fluorophore-buffer combinations exhibiting strong photoblinking (d) and weak photoblinking (e). Fitted rates are given for each fit.

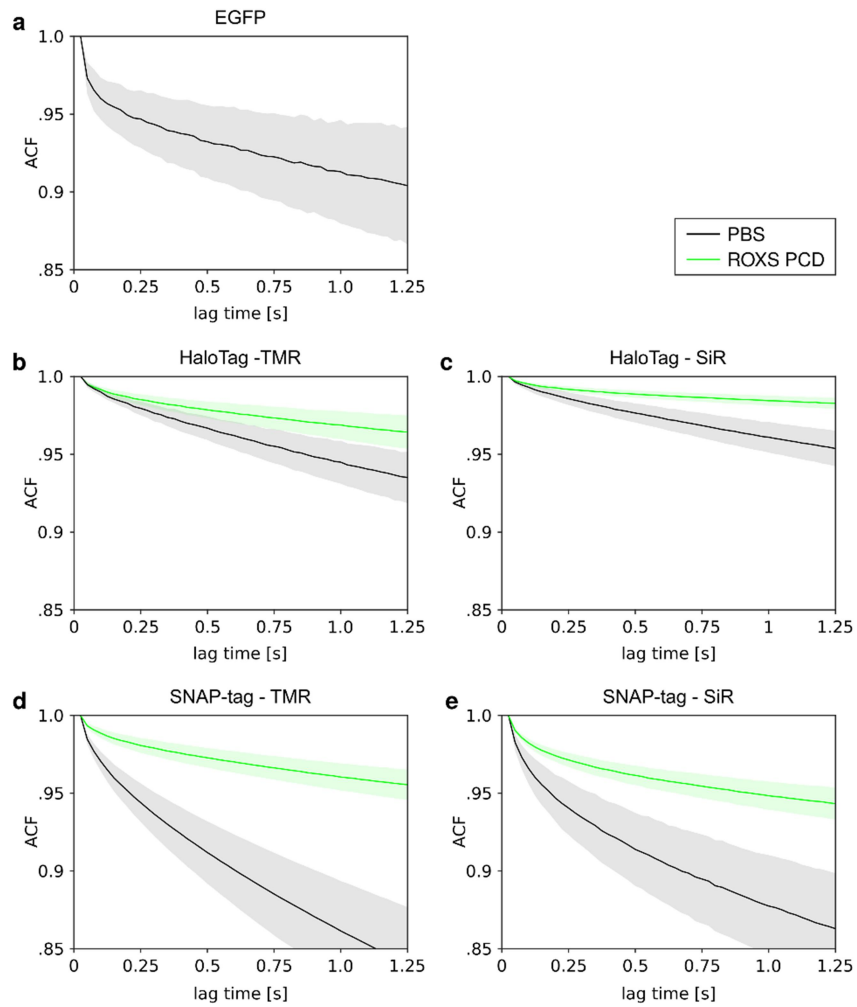

**Figure S4** Averaged (lines)  $\pm$ SD (shaded region) ACFs for indicated fluorophores in PBS (black) or ROXS PCD buffer (green). Averages from 22-54 measurements from 2-4 independent experiments per condition.



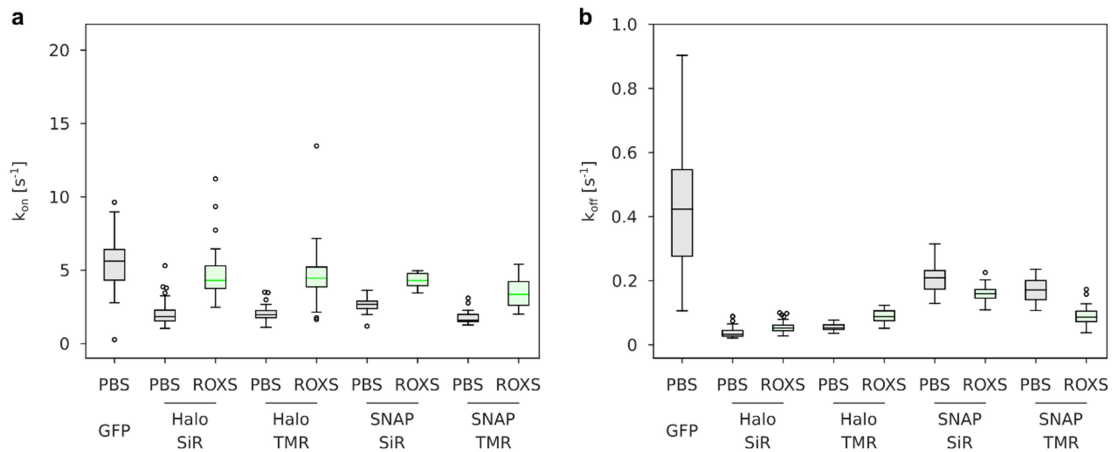

**Figure S5** Fluorophore on- (a) and off-rates (b) for photoblinking between fluorescent and non-fluorescent state in 3-state fluorophore model obtained from fitting of ACFs.

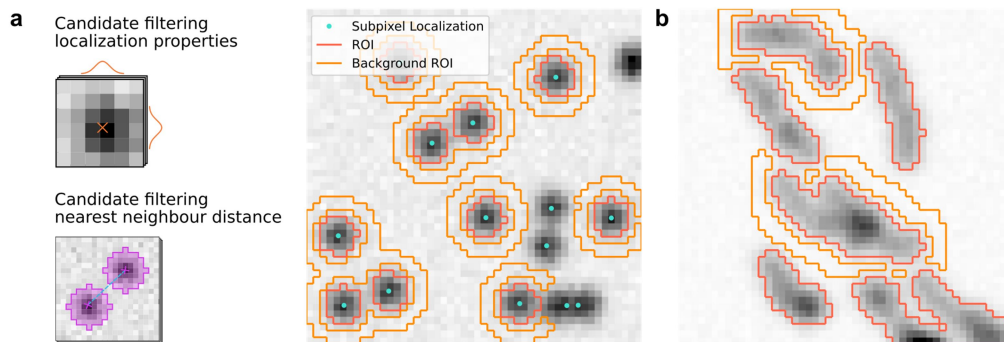

**Figure S6** Trace extraction routines included in the quickPBSA package shown schematically on artificial data. **a**, Extraction based on localization coordinates. Diffraction limited spots are excluded based on nearest neighbor distance and localization parameters such as width. **b**, Extraction based on a mask image. Overlap with other ROIs is excluded from background ROIs. ROIs can be excluded based on the ROI area.

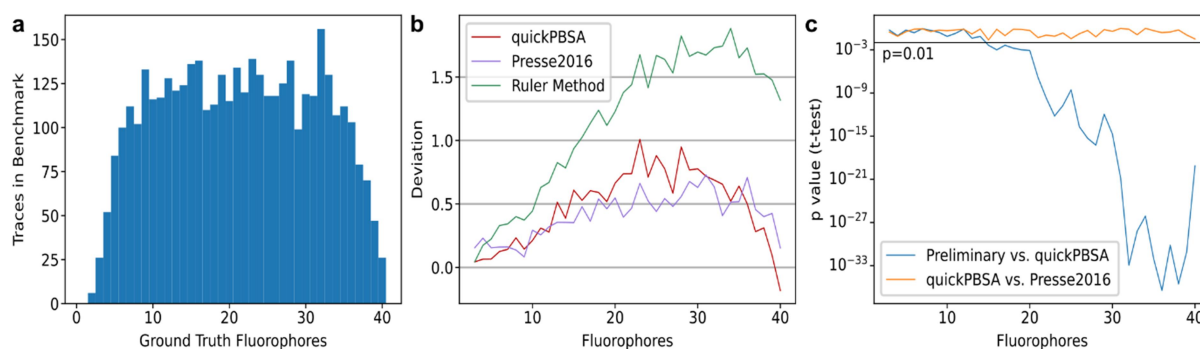

**Figure S7** Benchmarking of quickPBSA and comparison with alternative approaches. **a**, Histogram of the number of synthetic traces included in the benchmark for each ground-truth fluorophore number. **b**, Deviation of fluorophore number estimate with quickPBSA and Presse2016 compared to a simple ruler method. The ruler method compares the height of the last step with the intensity at the beginning of the trace. **c**, t-test result comparing the means extracted with quickPBSA to the results of Presse2016 and the result of the presented algorithm without the quickPBSA refinement step.

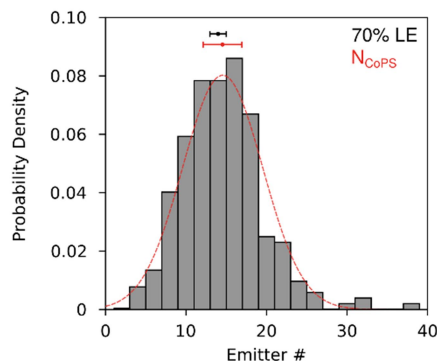

**Figure S8** Characterization of R20 DNA origami by CoPS. R20 DNA origami were immobilized as described above and imaged in ROXS PCD buffer supplemented with 10 mM  $MgCl_2$ . CoPS emitter number estimates from 386 origami. Distribution was modeled with a Gaussian function (dashed red line). Mean $\pm$ SD from CoPS measurements (black) and from binomial distribution assuming 70% LE (red) shown as dot and horizontal bars above distribution.

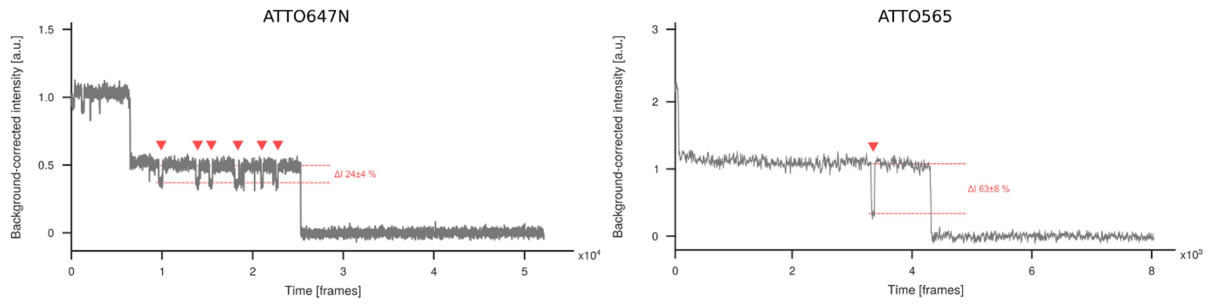

**Figure S9** Representative photobleaching traces from the measurements with ATTO 647N and ATTO 565 illustrating the impact of fluorophore properties on photobleaching measurements. The second bright state of ATTO 647N is similar in brightness and does not affect the measurement strongly. In contrast the second bright state of ATTO 565 has a much lower brightness and could explain the overestimation observed in the *in vitro* measurement (Figure 3 in the manuscript).

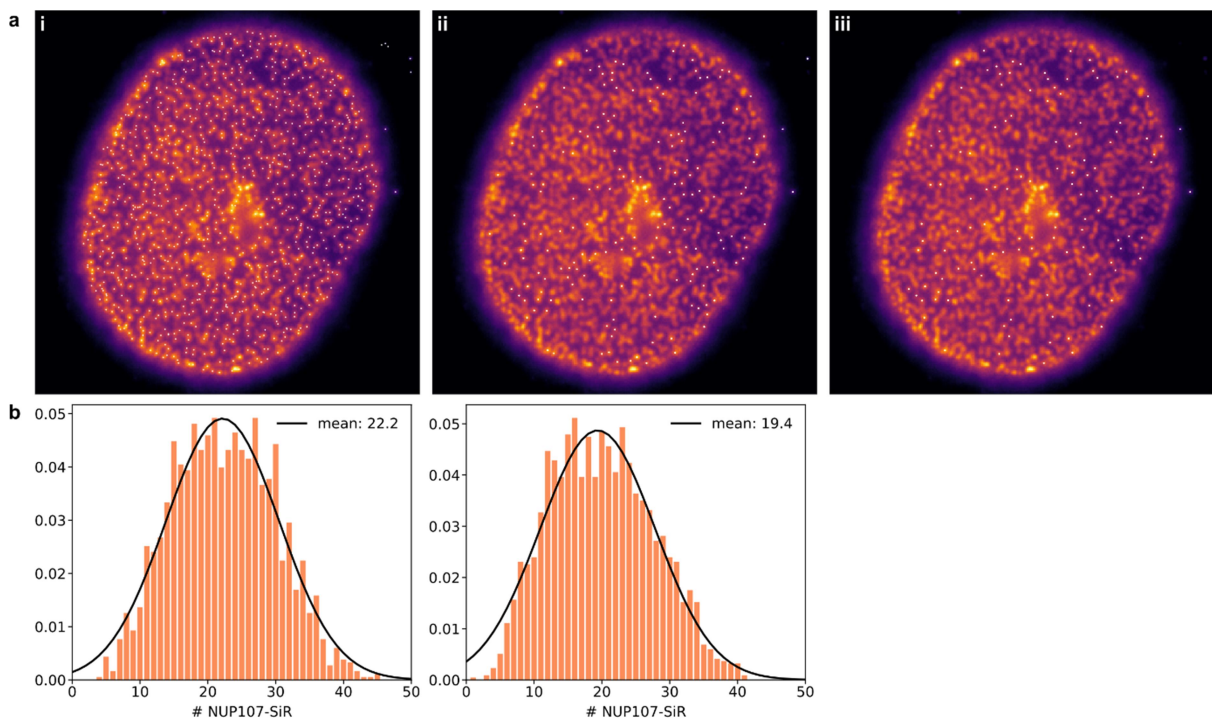

**Figure S10** Counting of NUP107. **a**, Representative image with point localization and trace extraction. i) Initial thunderSTORM localization result. ii) Remaining points after density filtering and filtering over Gaussian width from localization. iii) Successfully evaluated spots (not flagged out, see quickPBSA package documentation). **b**, Extracted fluorophore number distributions from the two independent measurements with 15 and 17 cells per experiment, respectively.

## SUPPLEMENTAL REFERENCES

- Erdmann, R.S., Baguley, S.W., Richens, J.H., Wissner, R.F., Xi, Z., Allgeyer, E.S., Zhong, S., Thompson, A.D., Lowe, N., Butler, R., Bewersdorf, J., Rothman, J.E., Johnston, D.S., Schepartz, A., Toomre, D., 2019. Labeling Strategies Matter for Super-Resolution Microscopy: A Comparison between HaloTags and SNAP-tags. *Cell Chem. Biol.* 26, 584-592.e6. <https://doi.org/10.1016/j.chembiol.2019.01.003>
- Grimm, J.B., English, B.P., Chen, J., Slaughter, J.P., Zhang, Z., Revyakin, A., Patel, R., Macklin, J.J., Normanno, D., Singer, R.H., Lionnet, T., Lavis, L.D., 2015. A general method to improve fluorophores for live-cell and single-molecule microscopy. *Nat. Methods* 12, 244–250. <https://doi.org/10.1038/nmeth.3256>
- Kalafut, B., Visscher, K., 2008. An objective, model-independent method for detection of non-uniform steps in noisy signals. *Comput. Phys. Commun.* 179, 716–723. <https://doi.org/10.1016/j.cpc.2008.06.008>
- Keppler, A., Arrivoli, C., Sironi, L., Ellenberg, J., 2006. Fluorophores for live cell imaging of AGT fusion proteins across the visible spectrum. *BioTechniques* 41, 167–175. <https://doi.org/10.2144/000112216>
- Lukinavičius, G., Umezawa, K., Olivier, N., Honigmann, A., Yang, G., Plass, T., Mueller, V., Reymond, L., Corrêa Jr, I.R., Luo, Z.-G., Schultz, C., Lemke, E.A., Heppenstall, P., Eggeling, C., Manley, S., Johnsson, K., 2013. A near-infrared fluorophore for live-cell super-resolution microscopy of cellular proteins. *Nat. Chem.* 5, 132–139. <https://doi.org/10.1038/nchem.1546>
- Sehayek, S., Gidi, Y., Glembockyte, V., Brandão, H.B., François, P., Cosa, G., Wiseman, P.W., 2019. A High-Throughput Image Correlation Method for Rapid Analysis of Fluorophore Photoblinking and Photobleaching Rates. *ACS Nano* 13, 11955–11966. <https://doi.org/10.1021/acsnano.9b06033>
- Tsekouras, K., Custer, T.C., Jashnsaz, H., Walter, N.G., Pressé, S., 2016. A novel method to accurately locate and count large numbers of steps by photobleaching. *Mol. Biol. Cell* 27, 3601–3615. <https://doi.org/10.1091/mbc.e16-06-0404>
